# Supplementary material
Source: PubMed Central journal article supplement (PMC4550481)
Supplement: NIHMS68207-supplement-supp_figs.pdf [file NIHMS68207-supplement-supp_figs.pdf]

**Title of Paper:** The Fourth *Apolipoprotein E* Haplotype Found in the Yoruba of Ibadan

**Authors and Affiliations:** Jill R. Murrell<sup>1</sup>, Brandon M. Price<sup>1</sup>, Olusegun Baiyewu<sup>2</sup>, Oye Gureje<sup>2</sup>, Mark Deeg<sup>3</sup>, Hugh Hendrie<sup>4</sup>, Adesola Ogunniyi<sup>2</sup>, Kathleen Hall<sup>4</sup>

<sup>1</sup>Department of Pathology, Indiana University School of Medicine, Indianapolis, Indiana

<sup>2</sup>Department of Medicine, University of Ibadan, Ibadan, Nigeria

<sup>3</sup>Department of Medicine, Indiana University School of Medicine, Indianapolis, Indiana

<sup>4</sup>Department of Psychiatry, Indiana University School of Medicine, Indianapolis, Indiana

**Supplemental Material.**

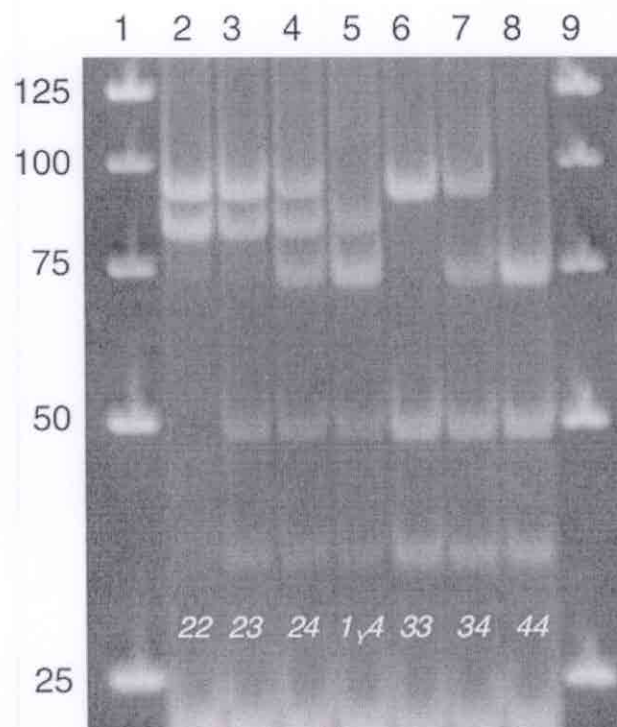

**Fig. 1.** HhaI digestion. Samples were amplified, digested with HhaI, and separated on an 8% polyacrylamide gel. Lanes 1 and 9 contain 25 base pair DNA ladder (Invitrogen, Carlsbad, Ca). Lane 5 shows the new allele.

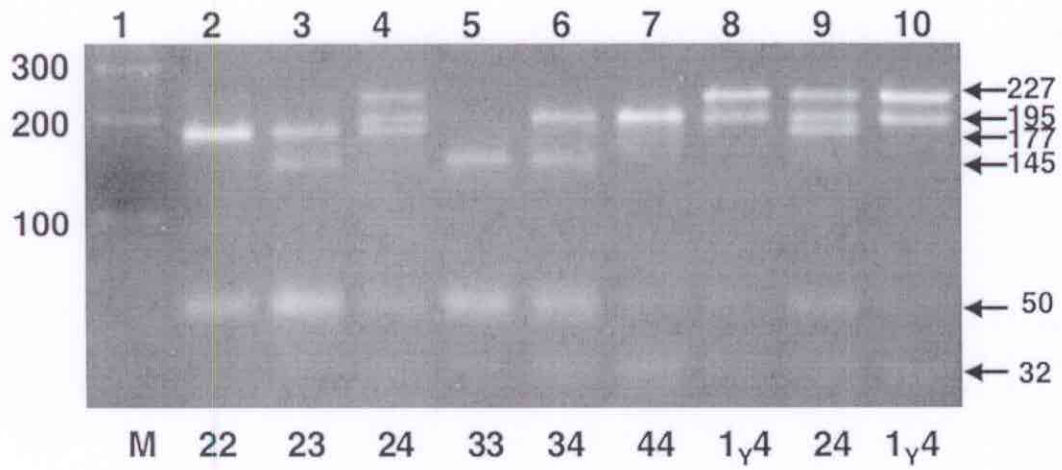

**Fig. 2.** AflIII and HaeII (New England Biolabs, Beverly, MA) digestion of *APOE* amplification products separated on a 4% composite agarose gel. Lane 1 contains 100 base pair (bp) DNA ladder (Seegene, Rockville, MD). The genotypes are listed for each lane and the band sizes are given in bp to the right. Neither enzyme digests the *APOE*  $\epsilon 1_{\gamma}$  allele. The subject (lane 8), her brother (lane 9) and her son (lane 10) were also analyzed. The undigested band (227 bp) seen in *APOE*  $\epsilon 2/\epsilon 4$  is due to the formation of heterodimers during amplification.
